# Supplementary material for: Bridging Electron and Nuclear Motions in Chemical Reactions through Electrostatic Forces from Reactive Orbitals
Source: Research Square preprint supplement (doi:10.21203/rs.3.rs-5665594/v1), 2025-01-09

# Supporting Information

## **Bridging Electron and Nuclear Motions in Chemical Reactions through Electrostatic Forces from Reactive Orbitals**

Takao Tsuneda<sup>\*,a,b</sup> and Tetsuya Taketsugu<sup>a,c</sup>

<sup>a</sup> Department of Chemistry, Faculty of Science, Hokkaido University, Sapporo 060-0810, Japan

<sup>b</sup> Graduate School of System Informatics, Kobe University, Nada-ku, Kobe, Hyogo 657-8501,  
Japan

<sup>c</sup> Institute for Chemical Reaction Design and Discovery (WPI-ICReDD), Hokkaido University,  
Sapporo 001-0021, Japan

\* Corresponding author: [takaotsuneda@sci.hokudai.ac.jp](mailto:takaotsuneda@sci.hokudai.ac.jp)

Figure S1. Variations in reactive orbital-based electrostatic force (ROEF) vectors along the B-C and C-A bond directions, represented by  $F_{BC}$  (red curves) and  $F_{CA}$  (blue curves), against the normalized intrinsic reaction coordinates (IRCs). These ROEF vector variations correspond to characteristic atom transfer reactions and are categorized into four types: I. Continuous forward ROEFs throughout the reaction, II. Sudden reaction-forward ROEFs just before the transition states (TSs), III. Forward ROEFs persisting until reaching the TSs followed by backward ROEFs, and IV. Backward ROEFs after the TSs, for forward processes. The variations are shown only for representative reactions of these types. ROEFs are derived from occupied reactive orbitals, as described in Eq. (8). The definitions for the vectors of  $F_{BC}$  and  $F_{CA}$  are detailed in Fig. 1(b). Green dotted lines mark the TS locations, while orange dotted lines indicate points where the combined ROEF values directed towards the reaction,  $F_{CA} - F_{BC}$ , reach their maximum. In parentheses attaching reaction formulae, the spin states of the reactive molecular orbitals that give larger maximum ROEF values are indicated.

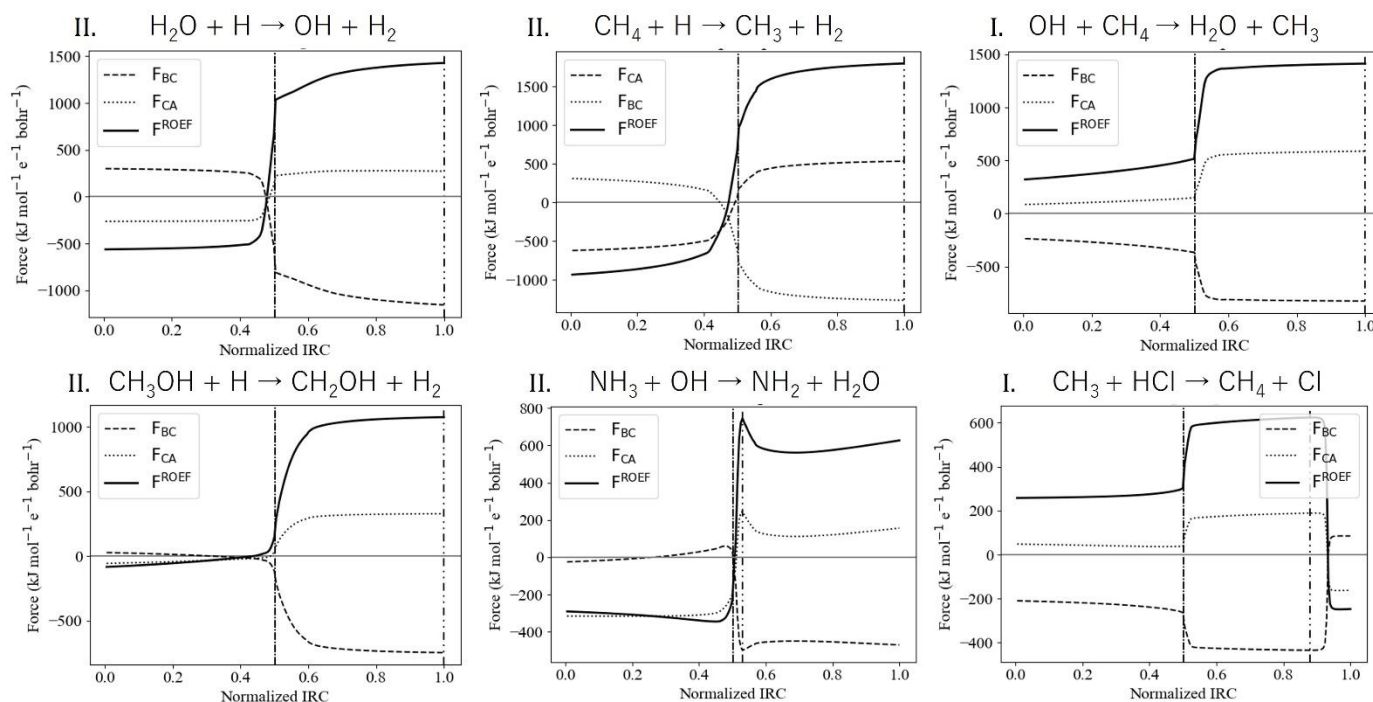

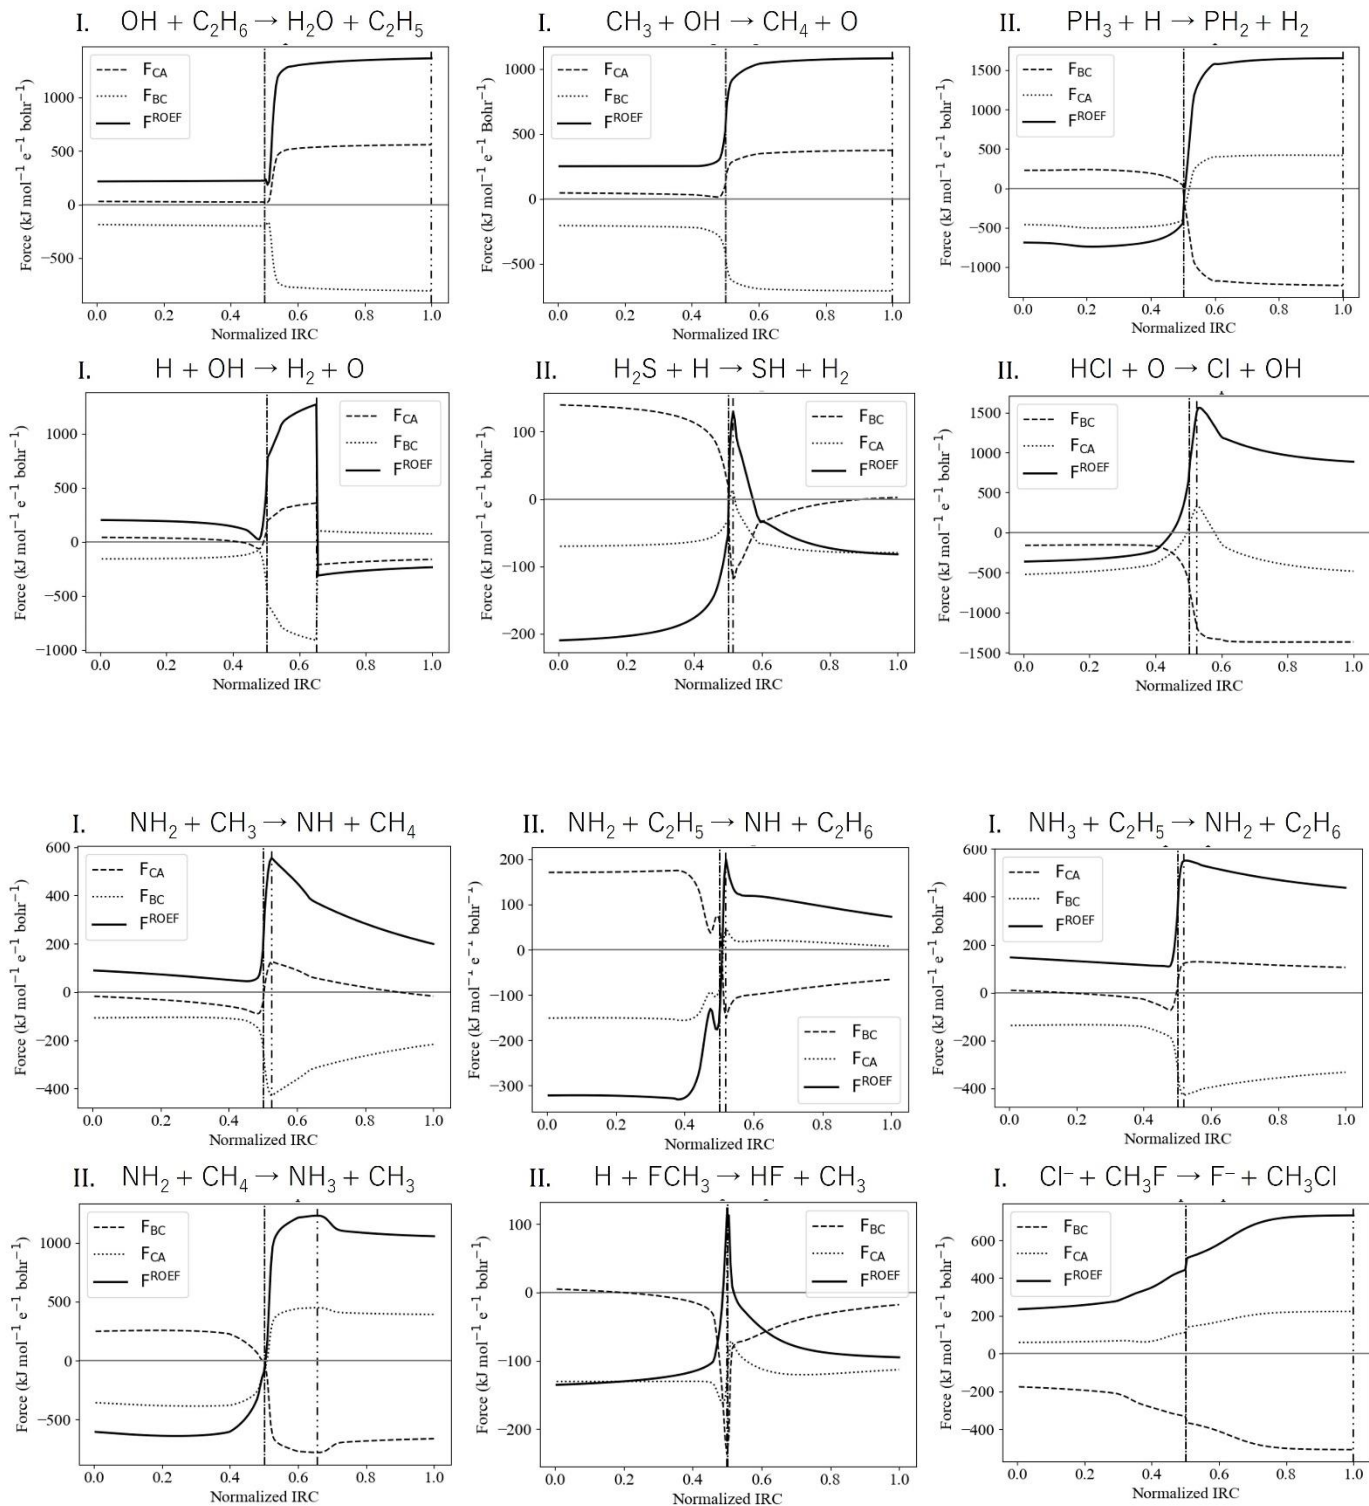

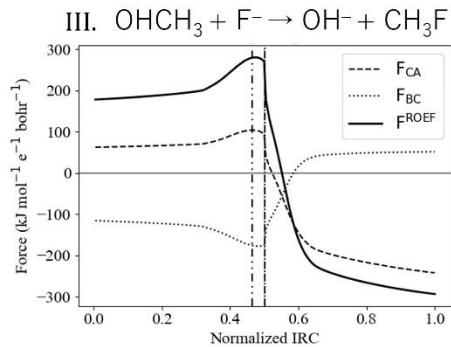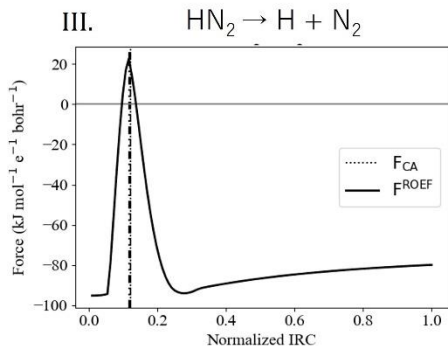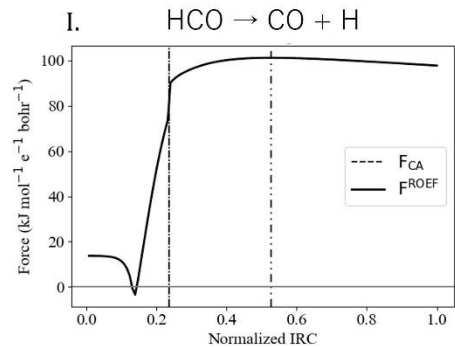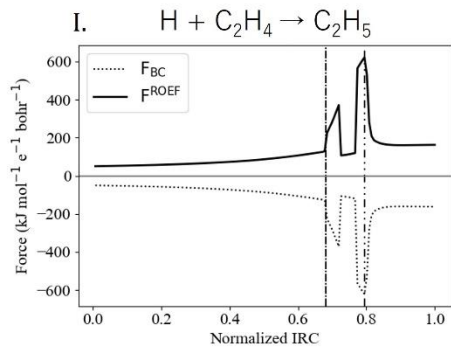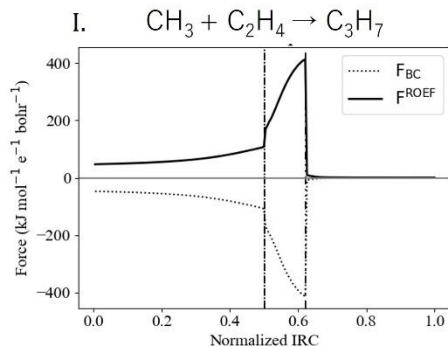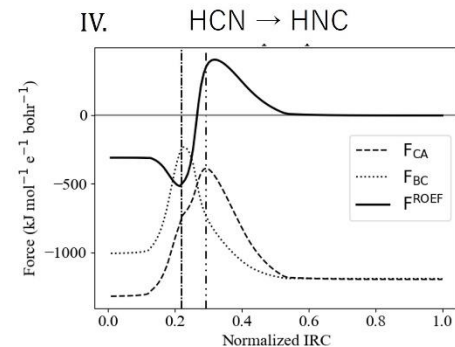

Figure S2. Variations in reactive orbital-based electrostatic force (ROEF) vectors along the B-C and C-A bond directions, represented by  $F_{BC}$  (red curves) and  $F_{CA}$  (blue curves), against the normalized intrinsic reaction coordinates (IRCs). These ROEF vector variations correspond to characteristic atom transfer reactions and are categorized into four types: I. Continuous forward ROEFs throughout the reaction, II. Sudden reaction-forward ROEFs just before the transition states (TSs), III. Forward ROEFs persisting until reaching the TSs followed by backward ROEFs, and IV. Backward ROEFs after the TSs, for backward processes. The variations are shown only for representative reactions of these types. ROEFs are derived from occupied reactive orbitals, as described in Eq. (8). The definitions for the vectors of  $F_{BC}$  and  $F_{CA}$  are detailed in Fig. 1(b). Green dotted lines mark the TS locations, while orange dotted lines indicate points where the combined ROEF values directed towards the reaction,  $F_{CA} - F_{BC}$ , reach their maximum. In parentheses attaching reaction formulae, the spin states of the reactive molecular orbitals that give larger maximum ROEF values are indicated.

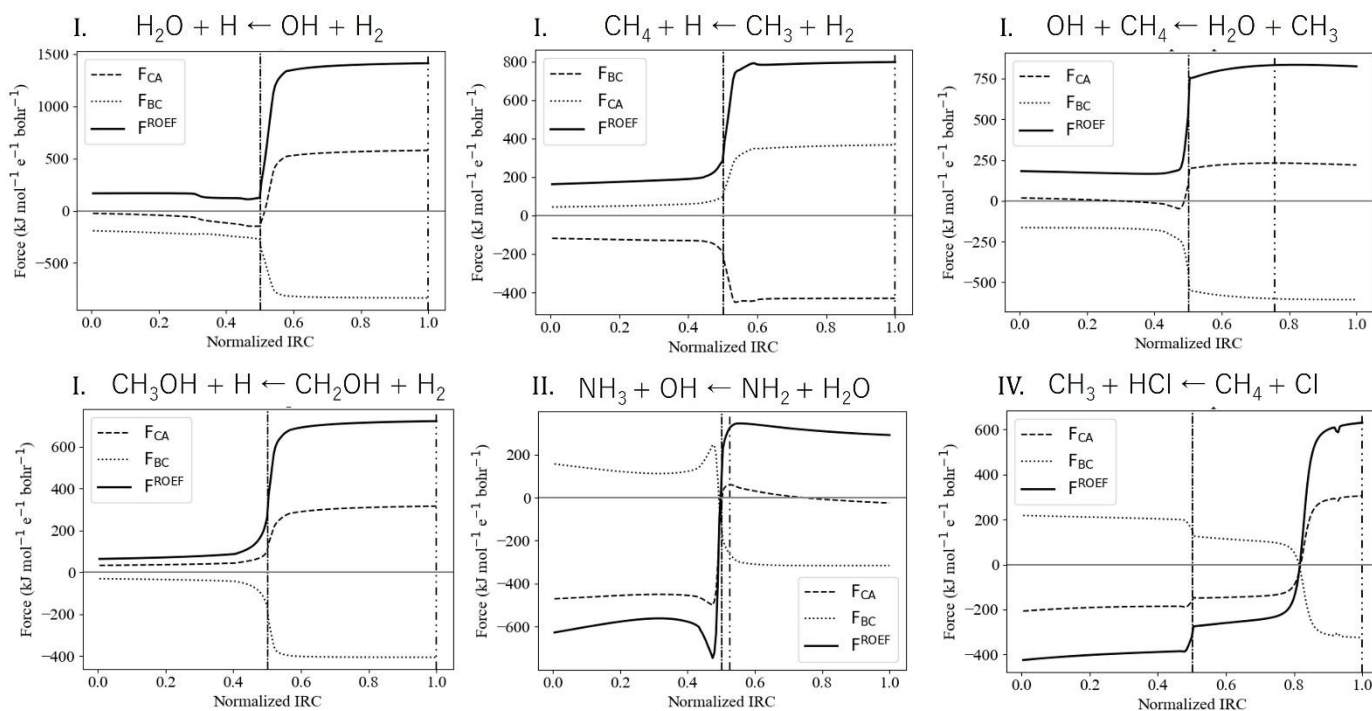

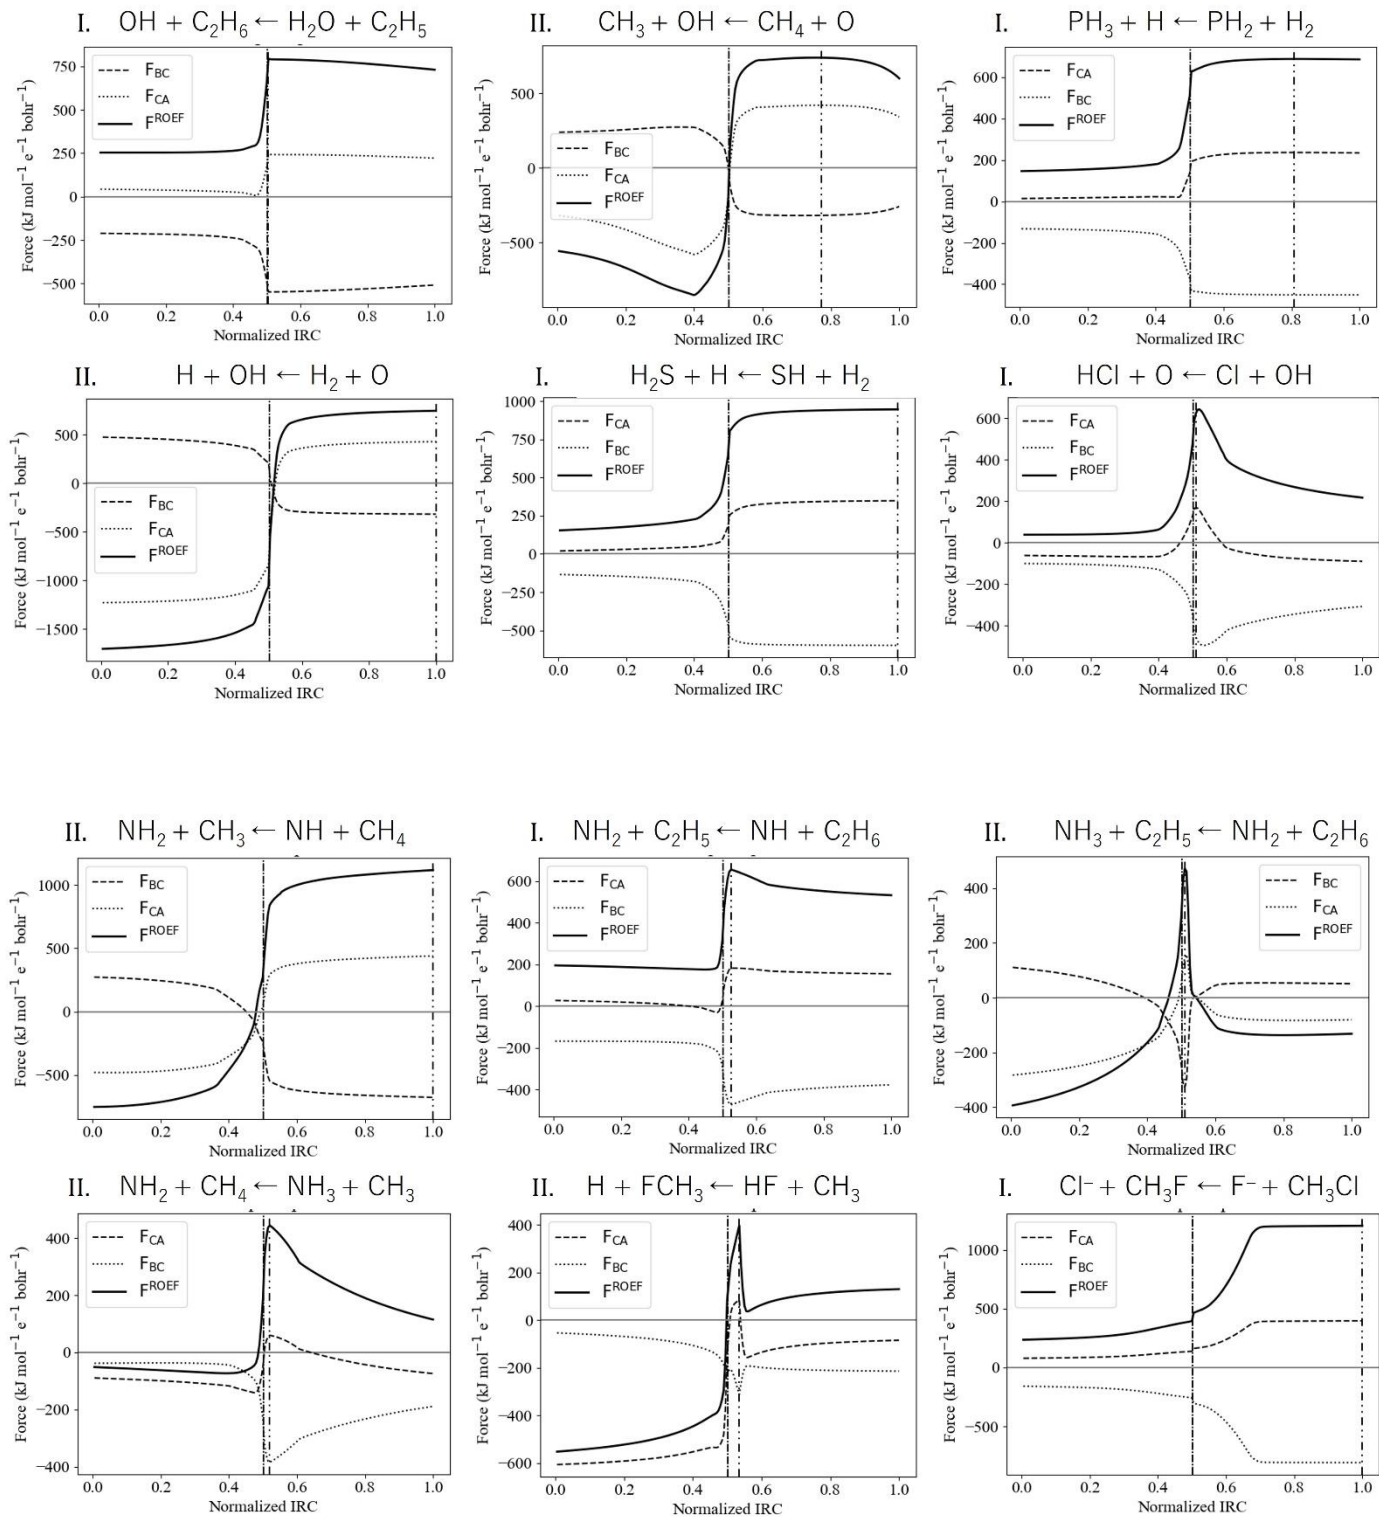

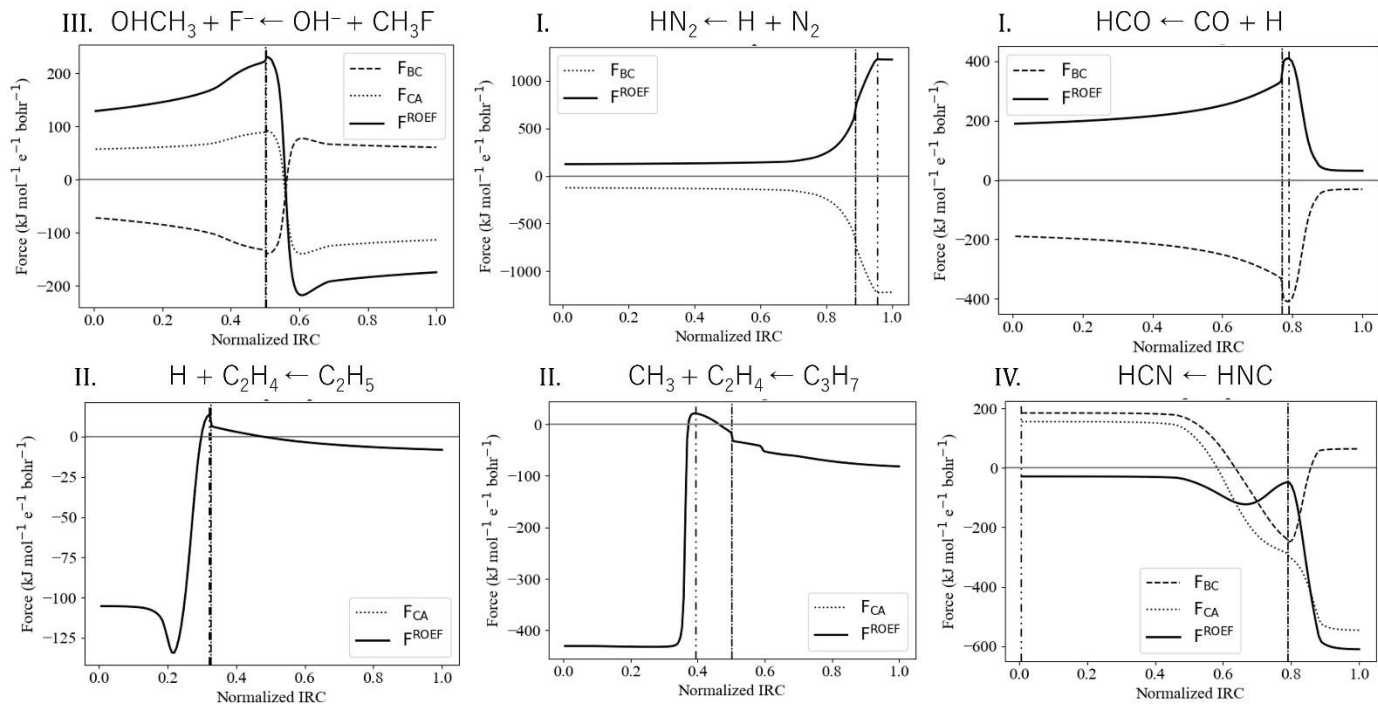

Supplement: Supplementary file 1 [file f460146da38c48ae6f49d21c.pdf]
